# Relief from nitrogen starvation entails quick unexpected down-regulation of glycolytic/lipid metabolism genes in enological *Saccharomyces cerevisiae*

Tesnière Catherine<sup>1</sup>, Bessière Chloé<sup>1</sup>, Pradal Martine<sup>1</sup>, Sanchez Isabelle<sup>1</sup>✉, Blondin Bruno<sup>1</sup>, Bigey Frédéric<sup>1\*</sup>

<sup>1</sup> SPO, INRA, Montpellier SupAgro, Univ Montpellier, Montpellier, France

✉Current Address: MISTEA, INRA, Montpellier SupAgro, Univ Montpellier, Montpellier, France

\* frederic.bigey@inra.fr

## Abstract

Nitrogen composition of the grape must has an impact on yeast growth and fermentation kinetics as well as on the organoleptic properties of the final product. In some technological processes, such as white wine/rosé winemaking, the yeast-assimilable nitrogen content is sometimes insufficient to cover yeast requirements, which can lead to slow or sluggish fermentations. Growth is nevertheless quickly restored upon relief from nutrient starvation, e.g. through the addition of ammonium nitrogen, allowing fermentation completion. The aim of this study was to determine how nitrogen repletion affected the genomic cell response of a *Saccharomyces cerevisiae* wine yeast strain, in particular within the first hour after nitrogen addition. We found almost 4000 genes induced or repressed, sometimes within minutes after nutrient changes. Some of the transcriptional responses to nitrogen depended on the TOR pathway, which controls positively ribosomal protein genes, amino acid and purine biosynthesis or amino acid permease genes and negatively stress-response genes, RTG specific TCA cycle genes and NCR sensitive genes. Some unexpected transcriptional responses concerned all the

glycolytic genes, the starch and glucose metabolism and citrate cycle-related genes that were down-regulated, as well as genes from the lipid metabolism.

## Introduction

The yeast cell *Saccharomyces cerevisiae* is able to control its growth in response to changes in nutrient availability. Nitrogen limitation is one of the most frequent limitations observed during wine fermentation [1]. The actual nitrogen content in must is dependent on many factors including rootstock, grape variety, climate, vine growing conditions, and grape processing. In enological conditions, musts are considered as nitrogen-limited when the assimilable nitrogen content is below 150 mg/L [1]. Assimilable nitrogen is important for fermentation kinetics, the maximal fermentative rate being related to the nitrogen level in the must [1]. In most cases of sluggish fermentations, nitrogen depletion quickly results in cells entering a stationary phase. This phenomenon is not related to a decrease in viability, but could rather be related to a catabolic inactivation of the hexose transporters [2] or to lower protein synthesis and cell protein content [3]. Other physiological changes such as autophagy, nitrogen recycling systems and the reorientation of the carbon flux to favour glycogen and trehalose storage have also been observed at the onset of nitrogen starvation [4]. In addition, the transcriptional remodelling associated with the onset of starvation during wine alcoholic fermentations has been described [3], including the development of a general stress response. These transcriptional changes are mostly controlled by the TOR pathway, sensing cell nitrogen status and adapting nitrogen metabolism to nutrient availability [5,6]. Nitrogen limitation stably arrests the cell cycle in  $G_1/G_0$ , whereas medium replenishment with the limiting nutrient quickly restores growth. Relief from nitrogen starvation is a way to increase the fermentation rate, while reducing its duration. In fact assimilable nitrogen addition to nitrogen-deficient must results in a reactivating protein synthesis and increasing sugar transport speed. Although this nitrogen addition is currently practised to reduce the risk of stuck fermentation in white and rosé wines, the molecular mechanisms triggered by nitrogen replenishment are poorly understood.

We report here an investigation of the rapid changes that occur in a wine yeast

strain in response to relief from nitrogen starvation with the aim of elucidating the underlying molecular mechanisms. We performed a transcriptomic study and investigated the changes occurring during the first hour following nitrogen addition. We found that nitrogen repletion very rapidly alters by at least 2-fold the levels of transcripts, a large portion of which are involved with either protein production during growth or decrease in response to stress. Signalling pathways involving PKA and TOR were also affected. The unexpected down-regulation of the glycolysis-related genes and of genes related to the lipid metabolism is discussed.

## Materials and methods

### Strain and culture conditions

All fermentation experiments were carried out in triplicates using the yeast strain *Saccharomyces cerevisiae* EC1118, a commercial wine yeast from Lallemand SA. The fermentation medium mimicks a standard natural must and has the same composition as the synthetic medium SM300 previously described [1], except for the total concentration of assimilable nitrogen that was 100 mg/L and the addition of 17 g/L  $\text{FeCl}_3 \cdot 6\text{H}_2\text{O}$ . Fermentations were conducted under constant stirring at 24°C in 1.2 L flasks equipped with locks to maintain anaerobiosis. Production of  $\text{CO}_2$  was monitored by weighing the flasks every 20 min, to determine weight loss. The rate of  $\text{CO}_2$  production was estimated using a polynomial smoothing as previously described [7]. The number of cells was determined with a particle counter (Coulter counter, Beckman Coulter). Preliminary experiments had shown that, under this condition, cells were starved for nitrogen (i.e. reached stationary phase) after 42 h when 14 g of  $\text{CO}_2$  has been released. Some cells were collected at this stage as controls ( $t = 0$ ), then diammonium phosphate (DAP) was added to the culture medium (300 mg/L final concentration), after removing an equivalent volume of medium to keep the total volume unchanged. Sampling was then performed 15, 30, 45 and 60 min after DAP addition and cells were quickly recovered by filtration as previously described [8].

## Labelling and microarray processing

Total RNA extraction, synthesis of labeled cDNA probes, array hybridization and digitalization were performed according to [9]. The microarray data were deposited in the Gene Expression Omnibus (GEO) repository under accession number GSE116766. The R v3.03 software was used for normalization and statistical analysis [10]. The raw data was imported and normalization between arrays (quantile method) was performed using the limma package [11]. The normalized data set is available in S1 Table.

## Statistical analysis

On the normalized data set, we analyzed gene expression changes over time using a regression based approach to find genes with temporal expression changes (S1 Fig). We defined a binomial regression model for each gene expression over 5 time points:

$Y = b_0 + b_1 t + b_2 t^2 + \epsilon$ , where  $Y$  is the normalized expression value,  $t$  is the time (min),

$b_0$  is expression at  $t = 0$ ,  $b_1$  is the slope (induction or repression of the gene, linear effect),  $b_2$  is a quadratic effect and  $\epsilon$  is the residual error term. A variable selection procedure was applied using step regression (backward method) to find significant coefficients for each gene. We adjusted this model by the least-squared technique for each gene and only genes with significant changes over time were selected with an adjusted p-value threshold of 0.01 corrected by the Benjamini-Hochberg method.

Distribution of  $b_1$  and  $b_2$  coefficients is presented on S1 Fig. The sign of  $b_1$  distinguish between up (positive, clusters 1,3,5,7) and down-regulated (negative, clusters 2,4,6,8) gene expression. Furthermore, the sign of  $b_2$  allow us to distinguish between accelerated (positive, clusters 2,5,7) and decelerated (negative, clusters 1,6,8) expression rate. Genes belonging to clusters 3 and 4 ( $b_2 = 0$ ) have linear expression profiles.

Functional analysis was performed looking for Gene Ontology (GO) term enrichment (biological process) using GO Term Finder [12] with the multiple test correction of Benjamini Hochberg.

## Results and Discussion

### Changes in fermentation kinetics after nitrogen repletion

We investigated the very early events occurring after relief of nitrogen starvation in a wine strain under enological conditions, by samplings every 15 min during the first hour of replenishment. Fig 1 presents a typical fermentation kinetics in a nitrogen-limited synthetic must [1]. First a rapid increase of the CO<sub>2</sub> production rate was observed, reaching a maximum (0.9 g/L/h) at 25 h after inoculation. Thereafter, the rate decreased sharply indicating an arrest of the population growth, the so called stationary phase, where nitrogen was limiting at 14 g of CO<sub>2</sub> released. Then the production rate decreased slowly up to 280 h, indicating that no more sugar was present in the medium. If diammonium phosphate (DAP) was added at the beginning of the stationary phase (42 h), a very quick restart of the rate of CO<sub>2</sub> production which peaked (1.2 g/L/h) higher than the maximum reached at the beginning of the fermentation (0.7 g/L/h). Fermentation ended in 190 h, reducing the fermentation duration by almost 30%. As previously described, the addition of DAP to nitrogen-starved wine yeast cells resulted in a very quick restart of the rate of CO<sub>2</sub> production concomitant with a restart of yeast division [1].

**Fig 1. Fermentation profiles** CO<sub>2</sub> production rate during fermentation in a nitrogen-depleted synthetic must (black). In another experiment (red), DAP was added at the beginning of the stationary phase (42 h; 14 g CO<sub>2</sub> released)

### Numerous changes in gene expression

#### Significantly regulated genes

We studied the expression of yeast genes within 1 hour following DAP addition at 0, 15, 30, 45 and 60 min (S1 Table). Transcriptome analysis revealed numerous changes during this first hour with almost 4800 nitrogen-regulated genes identified (S2 Table). This is much higher than the 350 genes regulated after 2 hours upon the addition of DAP to active dried yeast inoculated in a Riesling must [13], or than the 1000 [14] or 3000 [8] transcripts altered by the addition of nitrogen to laboratory yeast cells. These differences are probably due to improvements in the DNA microarray technology, to a

reduced time-scale or to the experimental conditions (synthetic versus natural must, 108  
industrial versus laboratory yeast strains). Respectively 2292 and 2507 genes were 109  
significantly up- or down-regulated (S2 Table), reflecting a massive change in expression 110  
patterns upon nitrogen repletion. Analysis of expression (S1 Fig) allowed us to classify 111  
genes expression profiles in 8 patterns depending on whether expression was induced 112  
(Fig 2) or repressed (Fig 3). 113

**Fig 2. Clusters of up-regulated genes** Clustering of expression pattern and  
GO-term enrichment were performed as described in the Materials and Methods

**Fig 3. Clusters of down-regulated genes** Clustering of expression pattern and  
GO-term enrichment were performed as described in the Materials and Methods

### Up-regulated genes 114

Cluster 1 contained 1555 genes exhibiting an initial linear increase ( $b_1 > 0$ , S1 Fig), 115  
sharp but transient, then a decrease of expression due to the negative quadratic term of 116  
the equation ( $b_2 < 0$ ). Functional analysis using GO-term enrichment showed that this 117  
cluster contained many genes involved in or related to ribosome biogenesis, RNA 118  
processing, transcription, translation, nitrogen compound metabolic process, nuclear 119  
transport (S3 Table). Cluster 3 contained 381 genes linearly induced within the first 120  
hour following repletion ( $b_1 > 0$  and  $b_2 = 0$ ), encoding proteins involved in the 121  
regulation of gene expression and of metabolic and biosynthetic processes. Cluster 5, 122  
which contained 292 genes that exhibited an expression accelerating with time ( $b_1 = 0$  123  
and  $b_2 > 0$ ), was enriched in genes involved in cellular amino-acid (*TRP2*, *MET8*, *HIS3*, 124  
*LEU4*, *TRP3*, *LYS2*, *HIS5*, *ARG4*, *HIS4*, *ARG7*, *ARG1*) and organic acids biosynthetic 125  
processes. Cluster 7 contained 64 genes that exhibited the highest increase in expression 126  
among all up-regulated genes, following a linear profile ( $b_1 > 0$ ) with a slight 127  
acceleration ( $b_2 > 0$ ). Functional analysis showed that this cluster was similar to cluster 128  
5. 129

This global response is similar to what was described for the commercial wine yeast 130  
strain VIN13, 2 hours after DAP addition [13], where an up-regulation was observed for 131  
genes involved in amino acid metabolism, de novo purine biosynthesis, and protein 132  
synthesis. Such changes likely corresponded to an activation of the Target of Rapamycin 133

(TOR) signaling pathway which positively controls ribosomal protein genes [15], amino acid and purine biosynthesis or amino acid permease genes [16]. Surprisingly, within 60 min we didn't find any change in the expression of genes related to sulfate assimilation, although this had been observed (after two hours) by [13].

Three components of the MCM (mini-chromosome maintenance) hexameric complex helicase, binding to chromatin as a part of the pre-replicative complex (*MCM2*, *MCM3*, and *MCM6*), and also *MAD1* and *YCG1*, were transiently but sharply induced after relief from nitrogen starvation. The MCM complex is required for the initiation of eukaryotic replication, while *MAD1* is a coiled-coil protein involved in the spindle-assembly checkpoint. Its phosphorylation leads to an inhibition of the activity of the anaphase promoting complex. *YCG1* is required for establishment and maintenance of chromosome condensation, chromosome segregation and chromatin binding of the condensin complex and is also required for clustering tRNA genes at the nucleolus. In addition, other cell-cycle related genes were induced, such as *RAD59*, *CDC20*, *RFA3*, *MSH2* and *YHM2*. Thus, all these transient inductions are coherent with a restart of the cell cycle in response to nitrogen replenishment.

### Down-regulated genes

Among the clusters corresponding to down-regulated genes (Fig 3), 2235 genes in cluster 2 exhibited an initial linear decrease ( $b_1 < 0$ ), sharp but transient, then an increase of expression due to the positive quadratic term of the equation ( $b_2 > 0$ ). Functional analysis showed that cluster 2 contained many genes involved in protein catabolic process, proteolysis, organonitrogen compound catabolic process, lipid metabolic process, response to stress, oxydo-reduction process, ATP synthesis, nucleotide metabolic process and aerobic respiration. Cluster 4 contained 168 genes that were linearly repressed during the first hour following repletion ( $b_1 < 0$  and  $b_2 = 0$ ). No significant enrichment in GO-terms was observed for this cluster. Cluster 6 contained 99 genes that exhibited a decelerating expression with time ( $b_1 = 0$  and  $b_2 < 0$ ) and was enriched in genes involved in nucleoside and ribonucleoside metabolic process, glycolytic process and ATP biosynthetic process. Finally, cluster 8 contained only 5 genes that exhibited an amplitude of down-regulation similar to the previous clusters. This is a linear profile ( $b_1 < 0$ ) with a slightly deceleration ( $b_2 < 0$ ). Functional analysis showed

no significant enrichment. 165

In our conditions (i.e. within one hour after repletion), we found other functions for 166  
down-regulated genes than those described previously [13]. In fact, genes related to 167  
cellular transport and transport mechanism were repressed in response to DAP addition 168  
(*NCE102*, *POR1*, *PMA2*, *ATP19*, *ATP2*, *UGA4*, *PUT4*, *GSP2*, *YPT53*). Other most 169  
interesting genes were those related to stress response, to NCR , to glycolysis or related 170  
lipid biosynthetic processes (among which ergosterol). Among genes in this last group, 171  
we found *ETR1*, *IFA38*, *ERG28*, *ERG4*, *ERG25*, *ERG11*, *NCP1*, *ERG20*, *ELO1*, *FAS1*, 172  
*ERG3*, *ERG6*, *ERG5*, *LIP1*, *ERG24*, *ACC1*, *POT1*, *TIP1*, *OPI3*, *YML131W*, *AAD10*, 173  
*GCY1*, *GRE3*, *TGL4* and, more specifically those related to ergosterol biosynthesis 174  
(*ERG28*, *ERG4*, *ERG25*, *ERG11*, *NCP1*, *ERG20*, *MCR1*, *ERG3*, *ERG6*, *ERG5*, *ERG24*, 175  
*ERG10*). 176

Moreover, DAP addition to a nitrogen starved yeast culture decreased the expression 177  
of a large group of stress-related genes, such as heat-shock protein related genes, but 178  
also PAU-related genes, which mostly belong to cluster 2. This pattern indicated that 179  
the down-regulation of these genes was a rapid phenomena, largely decreasing within 180  
the first 15 min after nitrogen repletion. Other genes related to stress gene regulation 181  
such as *HSF1*, *MSN2*, and *MSN4* [17] were also down-regulated in our study as well as 182  
genes involved in trehalose and glycogen metabolisms (*TPS1*, *TPS2*, *TPS3*, *ATH1*, 183  
*NTH1*, *NTH2*, *TSL1*, *GPH1*, *GPD1*, *GSY1*, *GSY2*). 184

Such changes are also likely related to an activation of the TOR signaling pathway 185  
that negatively controls stress response genes, the retrograde response (RTG) specific to 186  
the tricarboxylic acid (TCA) cycle genes and nitrogen catabolite repression (NCR) 187  
sensitive genes [16]. 188

Interestingly, the down-regulation of genes related to glycolysis, which has been 189  
previously reported in similar experimental conditions but on a laboratory strain [8], 190  
was confirmed here in an enological strain (S2 Fig). This indicates the conservation of 191  
this mechanism independently of strain specificity. As previously suggested, these 192  
unexpected results were probably revealed by analyzing the very early events following 193  
nitrogen replenishment. This repression of glycolytic genes in wine yeast had already 194  
been observed, but in rather different experimental conditions such as after rehydration 195  
of active dried yeasts and inoculation of a fermentation medium [18]. This repression 196



could be linked to a decrease in energy demand as suggested by these authors. 197

Other important changes were also revealed in the present study, concerning for 198  
instance the down-regulation of genes related to the MAPK signaling pathways, 199  
oxidoreductase activity, or NCR metabolism. Concerning genes related to stress and to 200  
NCR, their down-regulation corresponded to a common response to glucose, nitrogen 201  
and phosphorous depletion, whereas the down-regulation of nitrogenous compound 202  
catabolism and amino acid derivative transport were nitrogen-specific [14]. For these 203  
authors, both PKA and TOR signaling pathways might be involved in the responses to 204  
all three nutrients viz. glucose, nitrogen and phosphate. Surprisingly, these authors 205  
found that genes associated with glycolysis and gluconeogenesis were specifically 206  
repressed by phosphorous, whereas in the present study they were both nitrogen- and 207  
phosphate-regulated (as we used ammonium phosphate). 208

It was in fact surprising to observe the repression of all the glycolysis-related genes 209  
whereas genes related to ribosomal protein synthesis were up-regulated. This could 210  
indicate that the restart of the fermentative activity shortly after the addition of DAP 211  
was unrelated to the glycolytic pathway but rather to the cell cycle and protein 212  
synthesis activation. In fact, Rim15p, which gene expression is down-regulated in our 213  
study, has been found to integrate signals derived from PKA, TORC1 and Sch9p, which 214  
transmit the information concerning the availability of nutrients [19]. Rim15p regulates 215  
proper entry into  $G_0$  via the transcription factors Msn2/4p and Gis1p whose related 216  
genes were also down-regulated. The down-regulation of *RIM15* is thus coherent with 217  
the up-regulation of cell-cycle related genes and correspond to the model previously 218  
suggested [8]. 219

## Conclusion 220

The addition of nitrogen to starved wine yeast cells thus contributed to the development 221  
of a favorable environment for wine yeast growth and also to limit the general stress 222  
response. Most of these responses are quite the converse of changes observed in 223  
nitrogen-starved yeast, when cells reach the stationary phase stage [4]. 224

## Supporting information

225

**S1 Fig. Clustering method.** Schematic representation of the method used for the manual clustering of expression profiles. (PDF)

226

227

**S2 Fig. Expression profiles of glycolytic genes.** Expression profile of 16 glycolytic genes. (PDF)

228

229

**S1 Table. Gene expression over time.** Table of 6000 genes expression after normalization. (TSV)

230

231

**S2 Table. Clusters' composition.** Spreadsheet containing the name and function of each genes belonging to each cluster. (XLSX)

232

233

**S3 Table. Functional analysis.** Spreadsheet containing the GO-term enrichment for each cluster. (XLSX)

234

235

## Acknowledgments

236

We wish to warmly acknowledge Dr Philippe Chatelet for his useful suggestions on the text.

237

238

## Author contributions

239

B.B., C.T. and F.B. jointly conceived the study, interpreted the data and wrote the paper. C.B. and M.P. performed experiments. I.S. and F.B. conducted statistical analyses of microarray data.

240

241

242

## Data availability

243

Dataset, R scripts, figures and tables are available in open-access on Zenodo ([doi:10.5281/zenodo.1295508](https://doi.org/10.5281/zenodo.1295508))

244

245

## References

1. Bely M, Sablayrolles JM, Barre P. Automatic detection of assimilable nitrogen deficiencies during alcoholic fermentation in oenological conditions. *Journal of Fermentation and Bioengineering*. 1990;70(4):246–252. doi:10.1016/0922-338X(90)90057-4.
2. Busturia A, Lagunas R. Catabolite Inactivation of the Glucose Transport System in *Saccharomyces cerevisiae*. *Microbiology*. 1986;132(2):379–385. doi:10.1099/00221287-132-2-379.
3. Rossignol T, Dulau L, Julien A, Blondin B. Genome-wide monitoring of wine yeast gene expression during alcoholic fermentation. *Yeast*. 2003;20(16):1369–1385. doi:10.1002/yea.1046.
4. Tesnière C, Brice C, Blondin B. Responses of *Saccharomyces cerevisiae* to nitrogen starvation in wine alcoholic fermentation. *Applied Microbiology and Biotechnology*. 2015;99(17):7025–7034. doi:10.1007/s00253-015-6810-z.
5. Cardenas ME, Cutler NS, Lorenz MC, Como CJD, Heitman J. The TOR signaling cascade regulates gene expression in response to nutrients. *Genes & Development*. 1999;13(24):3271–3279.
6. Hardwick JS, Kuruvilla FG, Tong JK, Shamji AF, Schreiber SL. Rapamycin-modulated transcription defines the subset of nutrient-sensitive signaling pathways directly controlled by the Tor proteins. *Proceedings of the National Academy of Sciences of the United States of America*. 1999;96(26):14866.
7. Sablayrolles JM, Barre P, Grenier P. Design of a laboratory automatic system for studying alcoholic fermentations in anisothermal enological conditions. *Biotechnology Techniques*. 1987;1(3):181–184. doi:10.1007/BF00227557.
8. Tesnière C, Pradal M, Bessière C, Sanchez I, Blondin B, Bigey F, et al. Relief from nitrogen starvation triggers transient destabilization of glycolytic mRNAs in *Saccharomyces cerevisiae* cells. *Molecular Biology of the Cell*. 2017;29(4):490–498. doi:10.1091/mbc.E17-01-0061.

9. Tesniere C, Delobel P, Pradal M, Blondin B. Impact of Nutrient Imbalance on Wine Alcoholic Fermentations: Nitrogen Excess Enhances Yeast Cell Death in Lipid-Limited Must. *PLoS ONE*. 2013;8(4). doi:10.1371/journal.pone.0061645.
10. R Core Team. *R: A Language and Environment for Statistical Computing*. Vienna, Austria: R Foundation for Statistical Computing; 2017. Available from: <https://www.R-project.org>.
11. Smyth GK, Speed T. Normalization of cDNA microarray data. *Methods*. 2003;31(4):265–273. doi:10.1016/S1046-2023(03)00155-5.
12. Boyle EI, Weng S, Gollub J, Jin H, Botstein D, Cherry JM, et al. GO::TermFinder—open source software for accessing Gene Ontology information and finding significantly enriched Gene Ontology terms associated with a list of genes. *Bioinformatics*. 2004;20(18):3710–3715. doi:10.1093/bioinformatics/bth456.
13. Marks VD, Merwe VD, K G, Vuuren V, J j H. Transcriptional profiling of wine yeast in fermenting grape juice: regulatory effect of diammonium phosphate. *FEMS Yeast Research*. 2003;3(3):269–287. doi:10.1016/S1567-1356(02)00201-5.
14. Conway MK, Grunwald D, Heideman W. Glucose, Nitrogen, and Phosphate Repletion in *Saccharomyces cerevisiae*: Common Transcriptional Responses to Different Nutrient Signals. *G3: Genes, Genomes, Genetics*. 2012;2(9):1003–1017. doi:10.1534/g3.112.002808.
15. Powers T, Walter P, Kaiser C. Regulation of Ribosome Biogenesis by the Rapamycin-sensitive TOR-signaling Pathway in *Saccharomyces cerevisiae*. *Molecular Biology of the Cell*. 1999;10(4):987–1000. doi:10.1091/mbc.10.4.987.
16. Schnepfer L, Düvel K, Broach JR. Sense and sensibility: nutritional response and signal integration in yeast. *Current Opinion in Microbiology*. 2004;7(6):624–630. doi:10.1016/j.mib.2004.10.002.
17. Gasch AP, Spellman PT, Kao CM, Carmel-Harel O, Eisen MB, Storz G, et al. Genomic Expression Programs in the Response of Yeast Cells to Environmental Changes. *Molecular Biology of the Cell*. 2000;11(12):4241–4257. doi:10.1091/mbc.11.12.4241.

18. Rossignol T, Postaire O, Storaï J, Blondin B. Analysis of the genomic response of a wine yeast to rehydration and inoculation. *Applied Microbiology and Biotechnology*. 2006;71(5):699–712. doi:10.1007/s00253-006-0398-2.
19. Swinnen E, Wanke V, Roosen J, Smets B, Dubouloz F, Pedruzzi I, et al. Rim15 and the crossroads of nutrient signalling pathways in *Saccharomyces cerevisiae*. *Cell Division*. 2006;1:3. doi:10.1186/1747-1028-1-3.

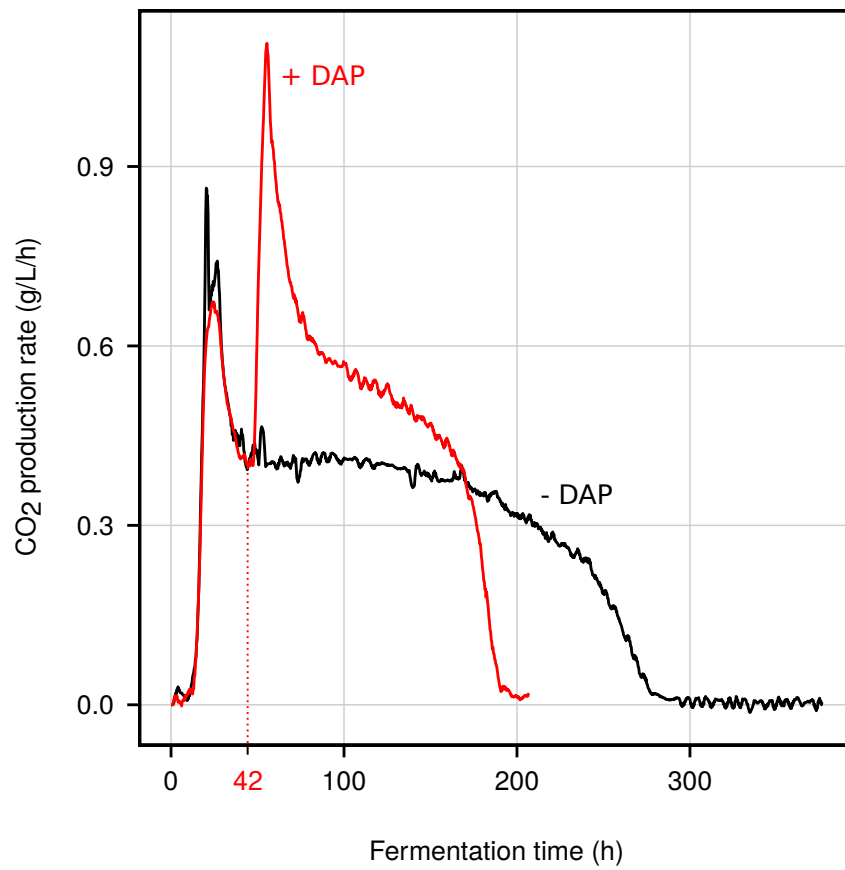

Figure 1

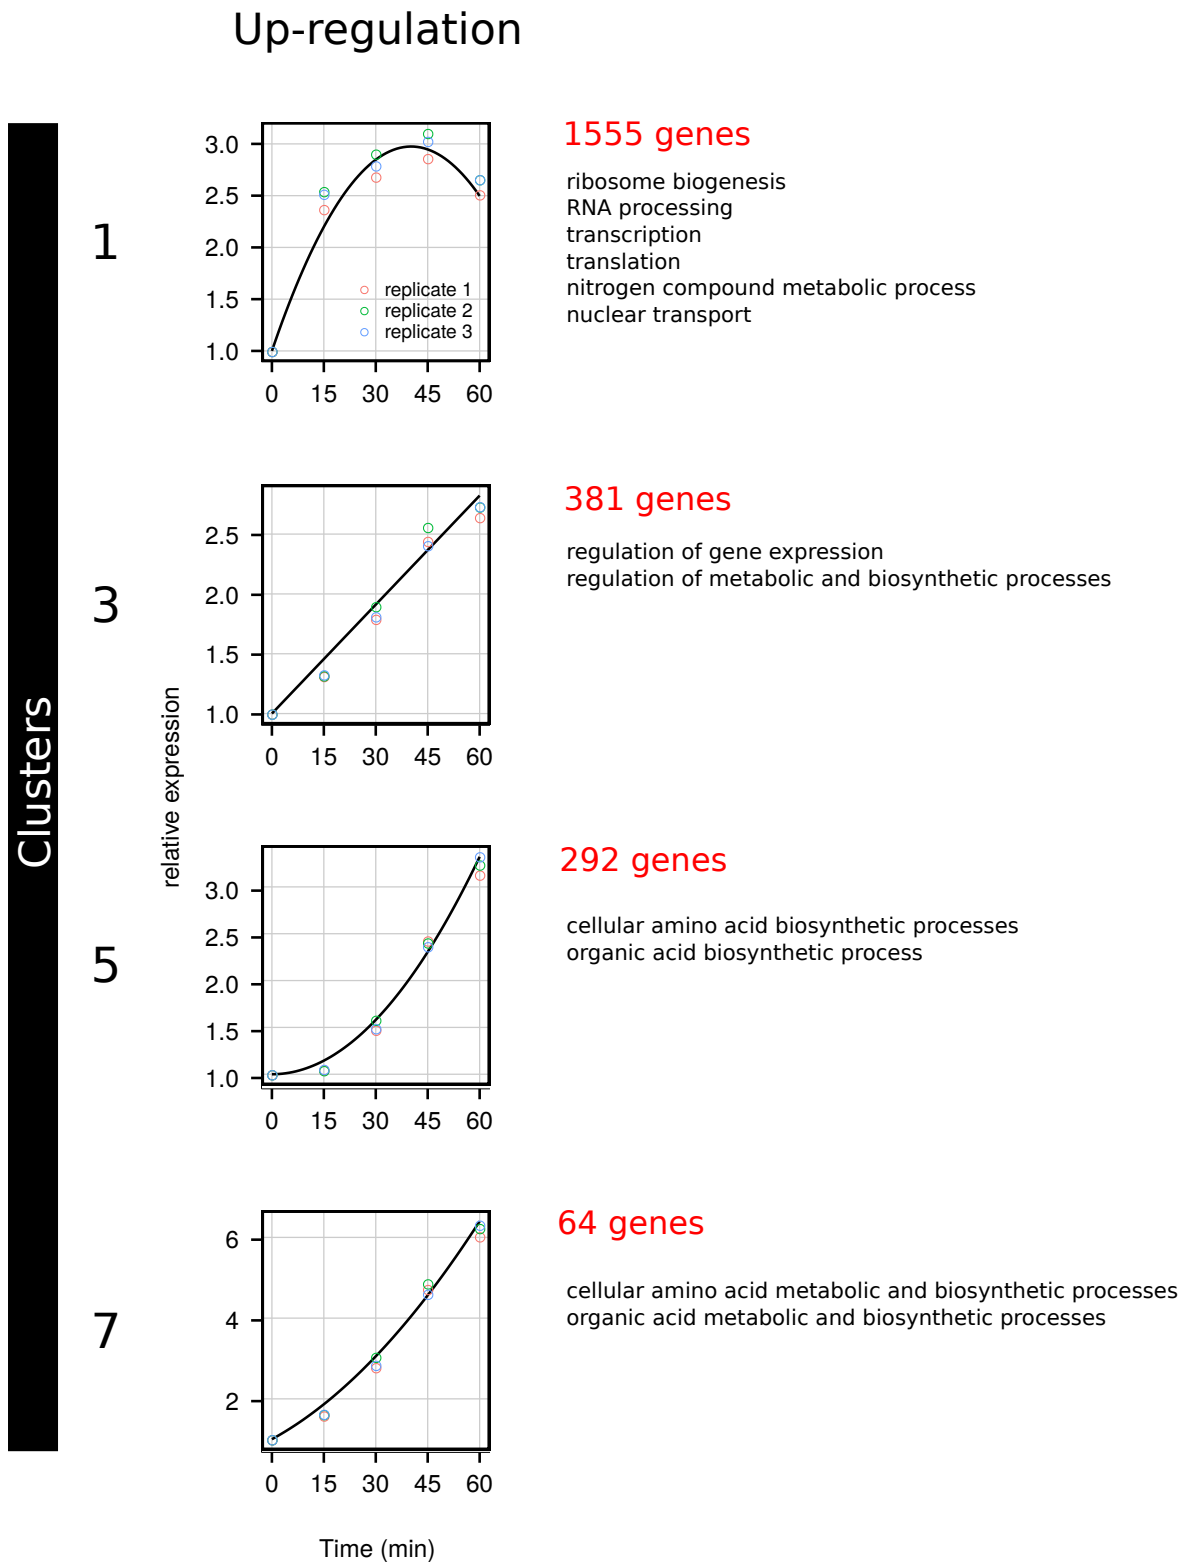

Figure 2

## Down-regulation

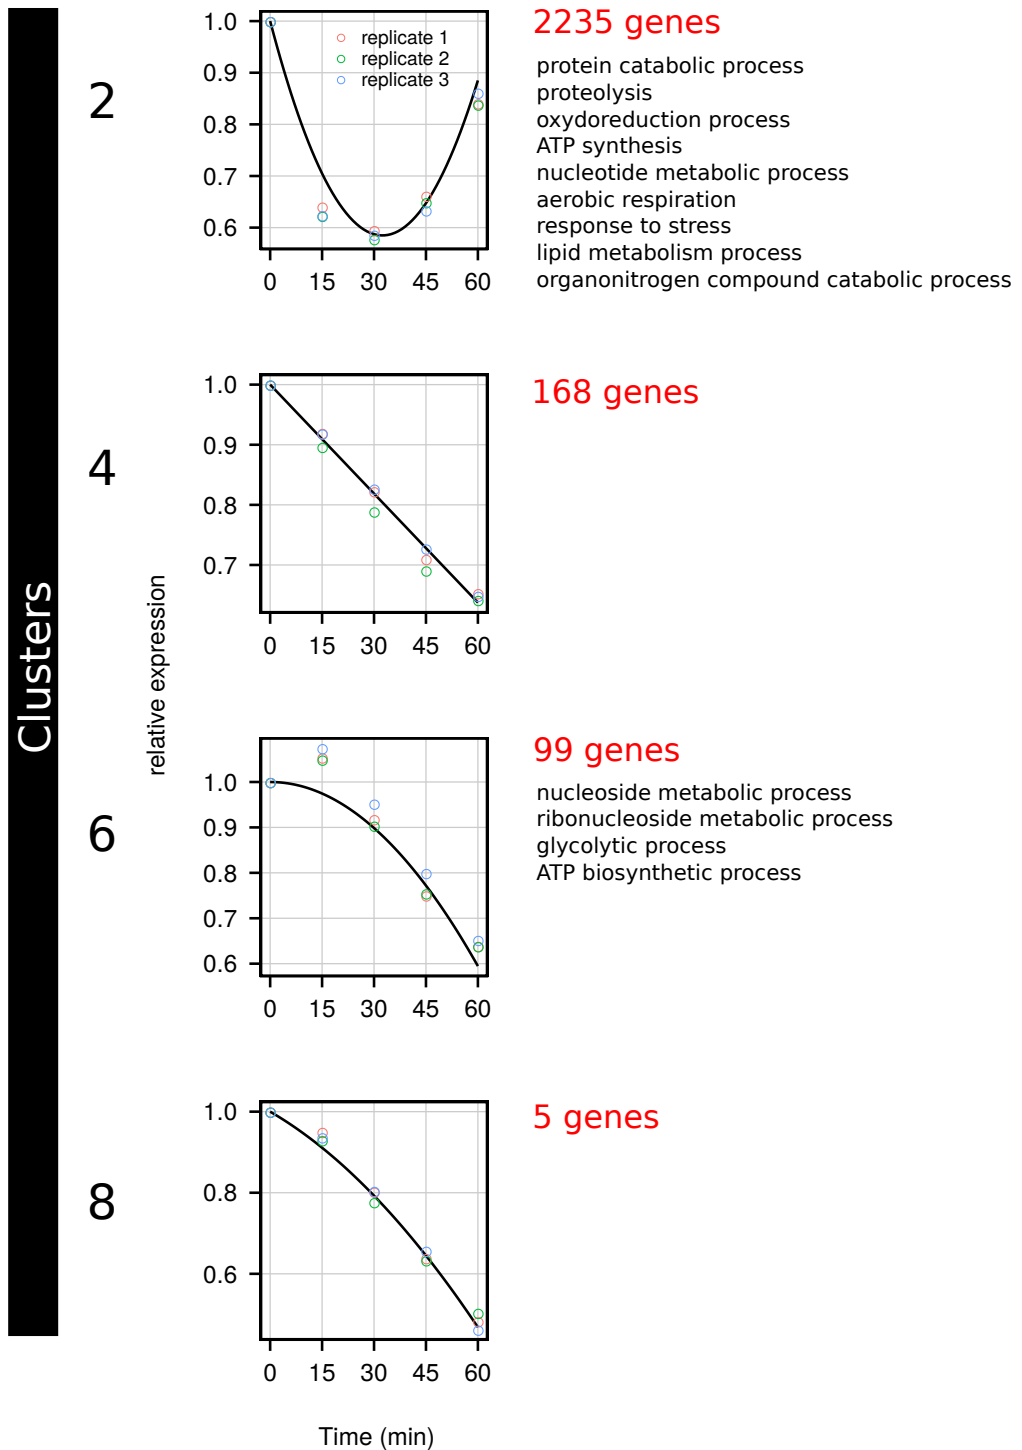

Figure 3
